# Supplementary material
Source: PubMed Central journal article supplement (PMC8923238)
Supplement: NIHMS1782491-supplement-Supplement.pdf [file NIHMS1782491-supplement-Supplement.pdf]

## Supplementary Material

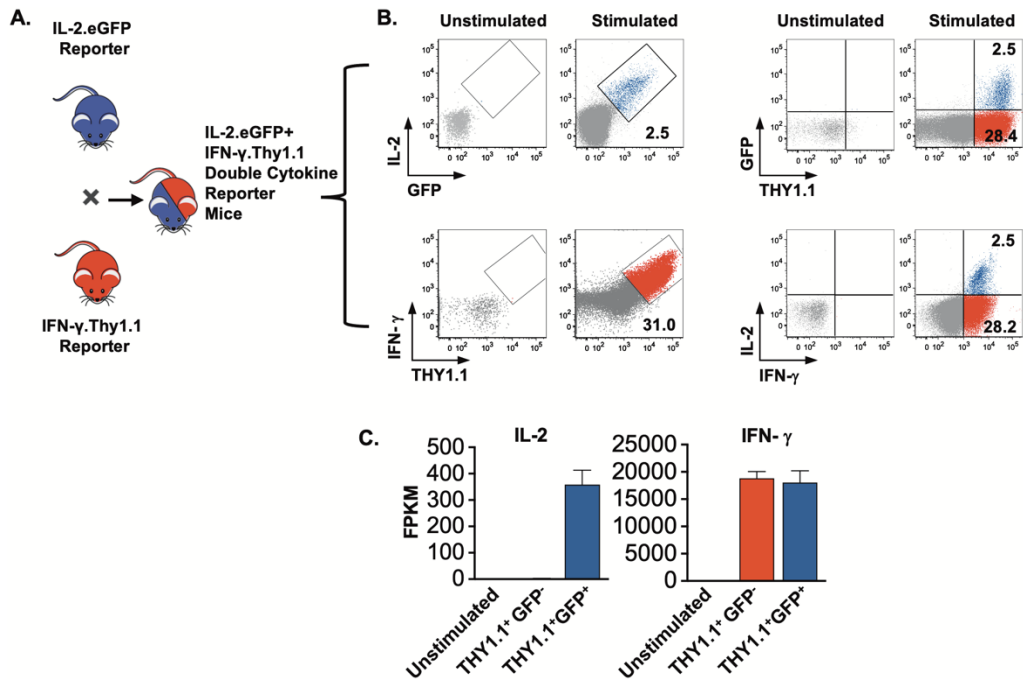

**Figure S1. Generation and authentication of IFN- $\gamma$ .Thy1.1 IL-2.GFP double cytokine reporter mice.**

(A) Schematic of the generation of IFN- $\gamma$ .Thy1.1 IL-2.GFP double cytokine reporter mice. IL-2.GFP and IFN- $\gamma$ .Thy1.1 reporter mice were intercrossed and then further bred to generate homozygous IFN- $\gamma$ .Thy1.1 IL-2.GFP double cytokine reporter mice.

(B) The correlation between IL-2 and GFP expression (top) and IFN- $\gamma$  and Thy1.1 (bottom) was tested using a two color cytokine secretion assay (Miltenyi) using splenic effector CD8 T cells at 9 days following LCMV-ARM infection. Cells were either left untreated or stimulated with a cocktail of GP33, GP276, and NP396 peptide epitopes (1 $\mu$ g/mL each) for 3.5hr followed by a 45min period of secretion assessment with the catch reagents.

(C) FPKM values of *il2* and *ifng* derived from RNA-seq analysis of sorted unstimulated, and LCMV-GP33 stimulated P14-specific GFP+THY1.1+ and GFP-THY1.1+ effector CD8 T cells procured at 9 days post infection.

Figure S2

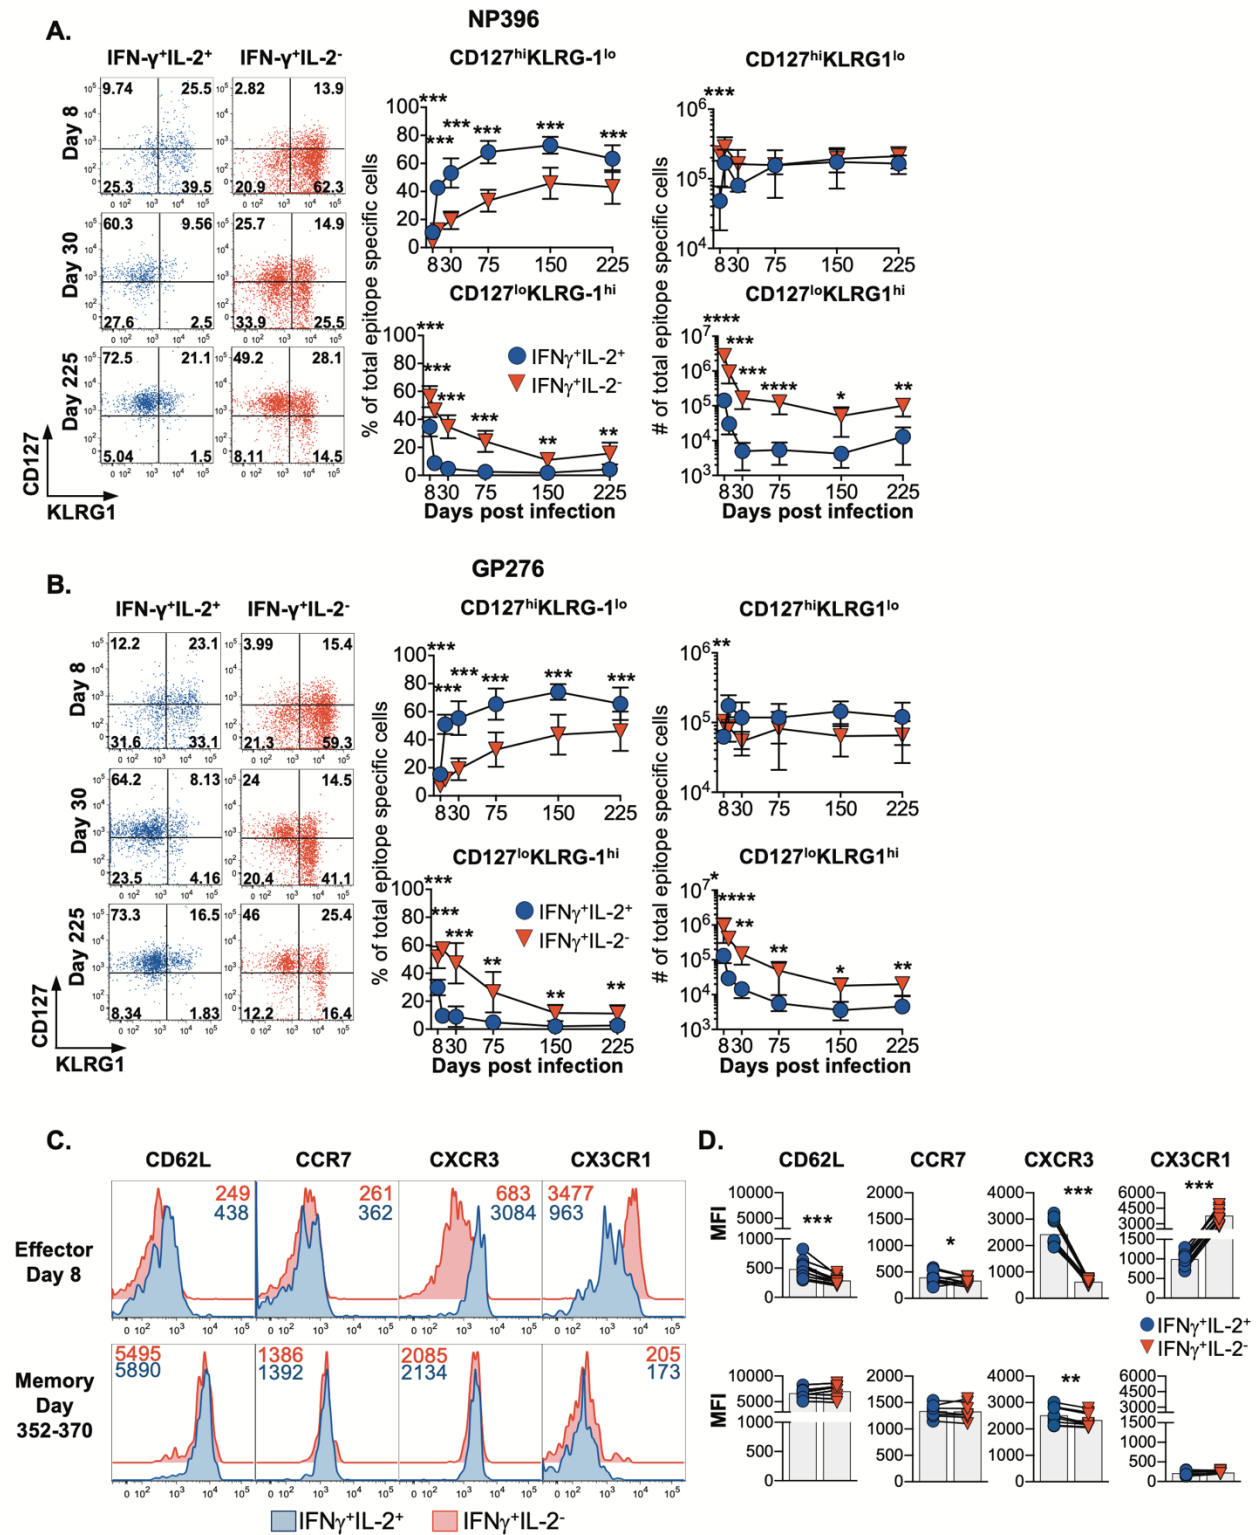

**Figure S2. IL-2-producing effector CD8 T cells more rapidly attain a canonical memory phenotype.**

Analysis of CD127 and KLRG1 expression by splenic IL-2-producing (IFN- $\gamma$ <sup>+</sup>IL-2<sup>+</sup>; blue) and non-IL-2-producing (IFN- $\gamma$ <sup>+</sup>IL-2<sup>-</sup>; red) LCMV NP396 epitope-specific (A) and LCMV GP276-specific (B) CD8 T cells over time following acute LCMV infection. (C-D) The expression of select effector- and memory-associated molecules by IL-2 producing (blue) and non-producing (red) LCMV-specific P14 CD8 T cells at effector and memory time points following adoptive transfer and priming by acute LCMV infection. Composite data are shown from 3 experiments analyzing a total of 6-12 mice per group. p values were calculated using paired two-tailed t tests. \*p<0.05, \*\*p<0.01, \*\*\*p<0.001

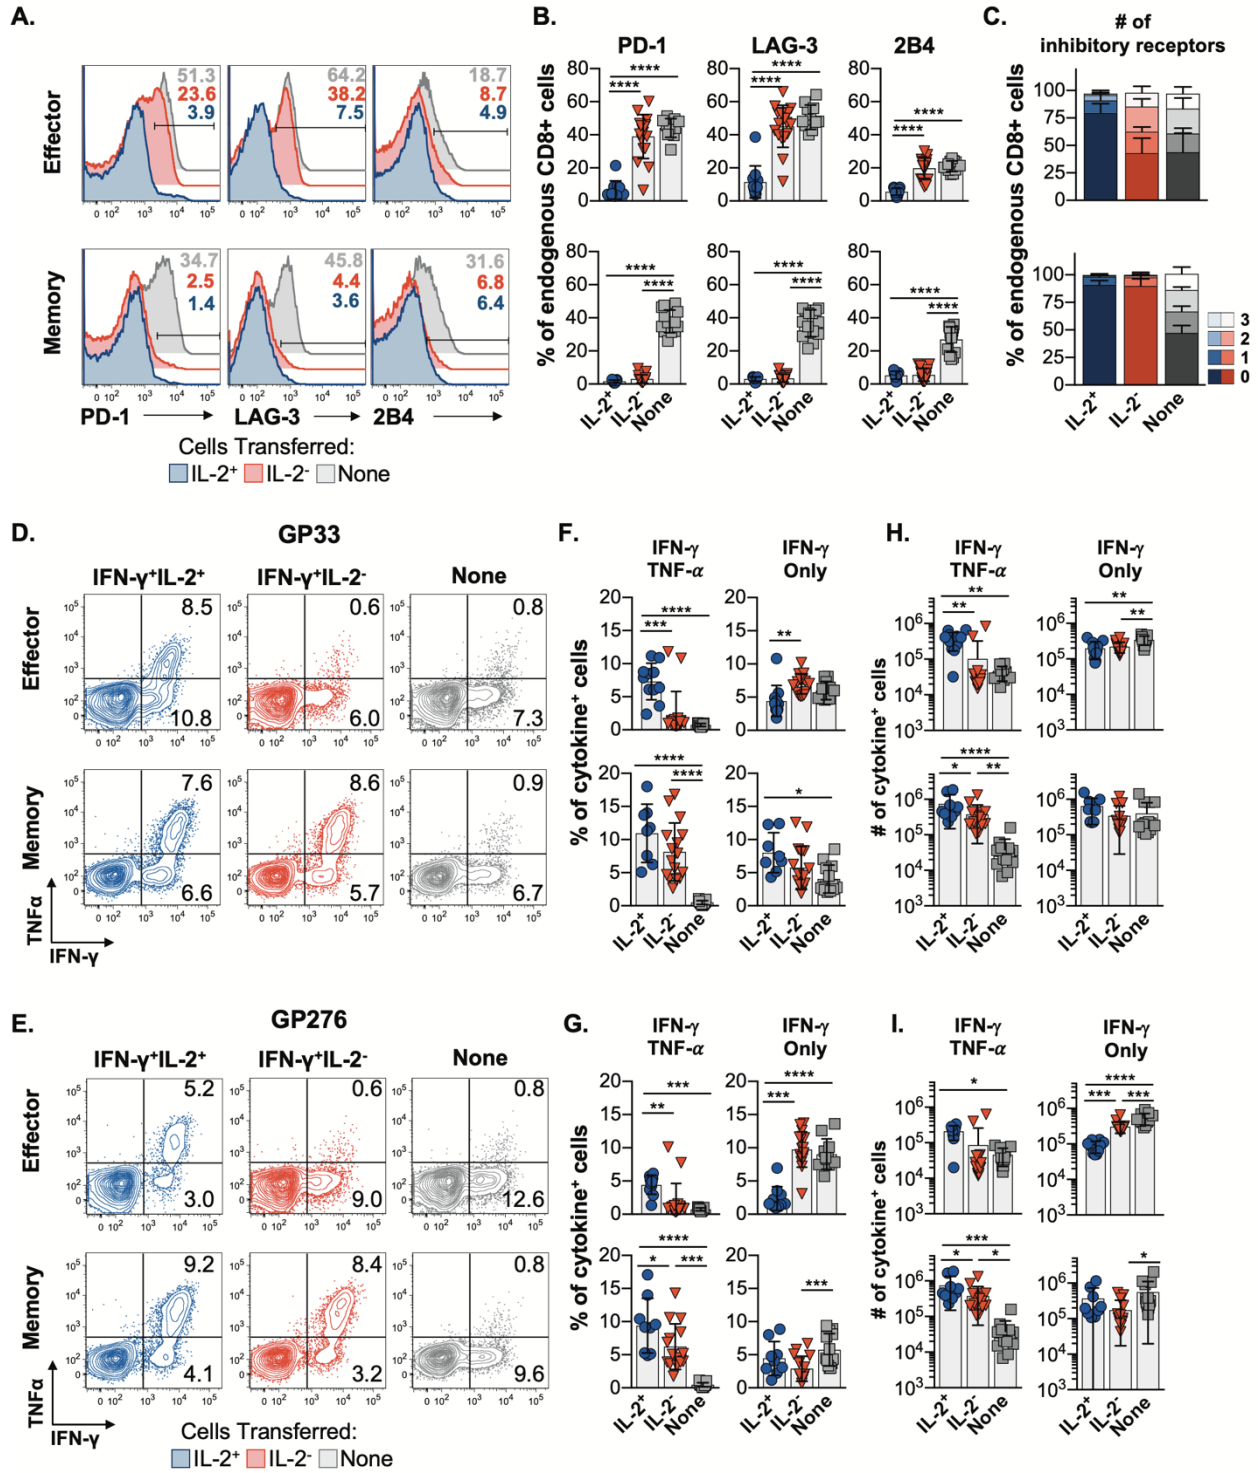

**Figure S3.** IL-2<sup>+</sup> effector as well as IL-2<sup>+</sup> and IL-2<sup>-</sup> memory CD8 T cells rescue the endogenous response following chronic viral challenge.

(A) Representative flow histograms and (B) composite data showing the expression of PD-1, LAG-3, and 2B4 by the recipients' endogenous CD8 T cells recovered from mice that received donor NP396-specific IFN- $\gamma$ <sup>+</sup>IL-2<sup>+</sup> (blue) or IFN- $\gamma$ <sup>+</sup>IL-2<sup>-</sup> (red) effector (top) or memory (bottom) CD8 T cells and were then challenged with LCMV-clone 13 as in Figure 3A. Responses in control mice that did not receive donor cells (none; gray) are also shown.

(C) The percentage of endogenous CD8 T cells which co-express 0, 1, 2, or 3 inhibitory receptors.

(D-E) Flow cytometry plots, (F, G) percentages and (H, I) numbers of IFN- $\gamma$  and TNF- $\alpha$  producing LCMV GP33- (D, F, H) or GP276- (E, G, I) specific endogenous CD8 T cells from recipients that received IFN- $\gamma$ <sup>+</sup>IL-2<sup>+</sup> (blue) or IFN- $\gamma$ <sup>+</sup>IL-2<sup>-</sup> (red) effector (top) or memory (bottom) CD8 T cells, or that did not receive donor cells (gray).

Representative or composite findings are shown from 3 experiments analyzing a total of 9-16 mice per group. Bar graphs show mean  $\pm$  SD with p values calculated using one-way ANOVA.

\*p<0.05, \*\*p<0.01, \*\*\*p<0.001, \*\*\*\*p<0.0001

Figure S4

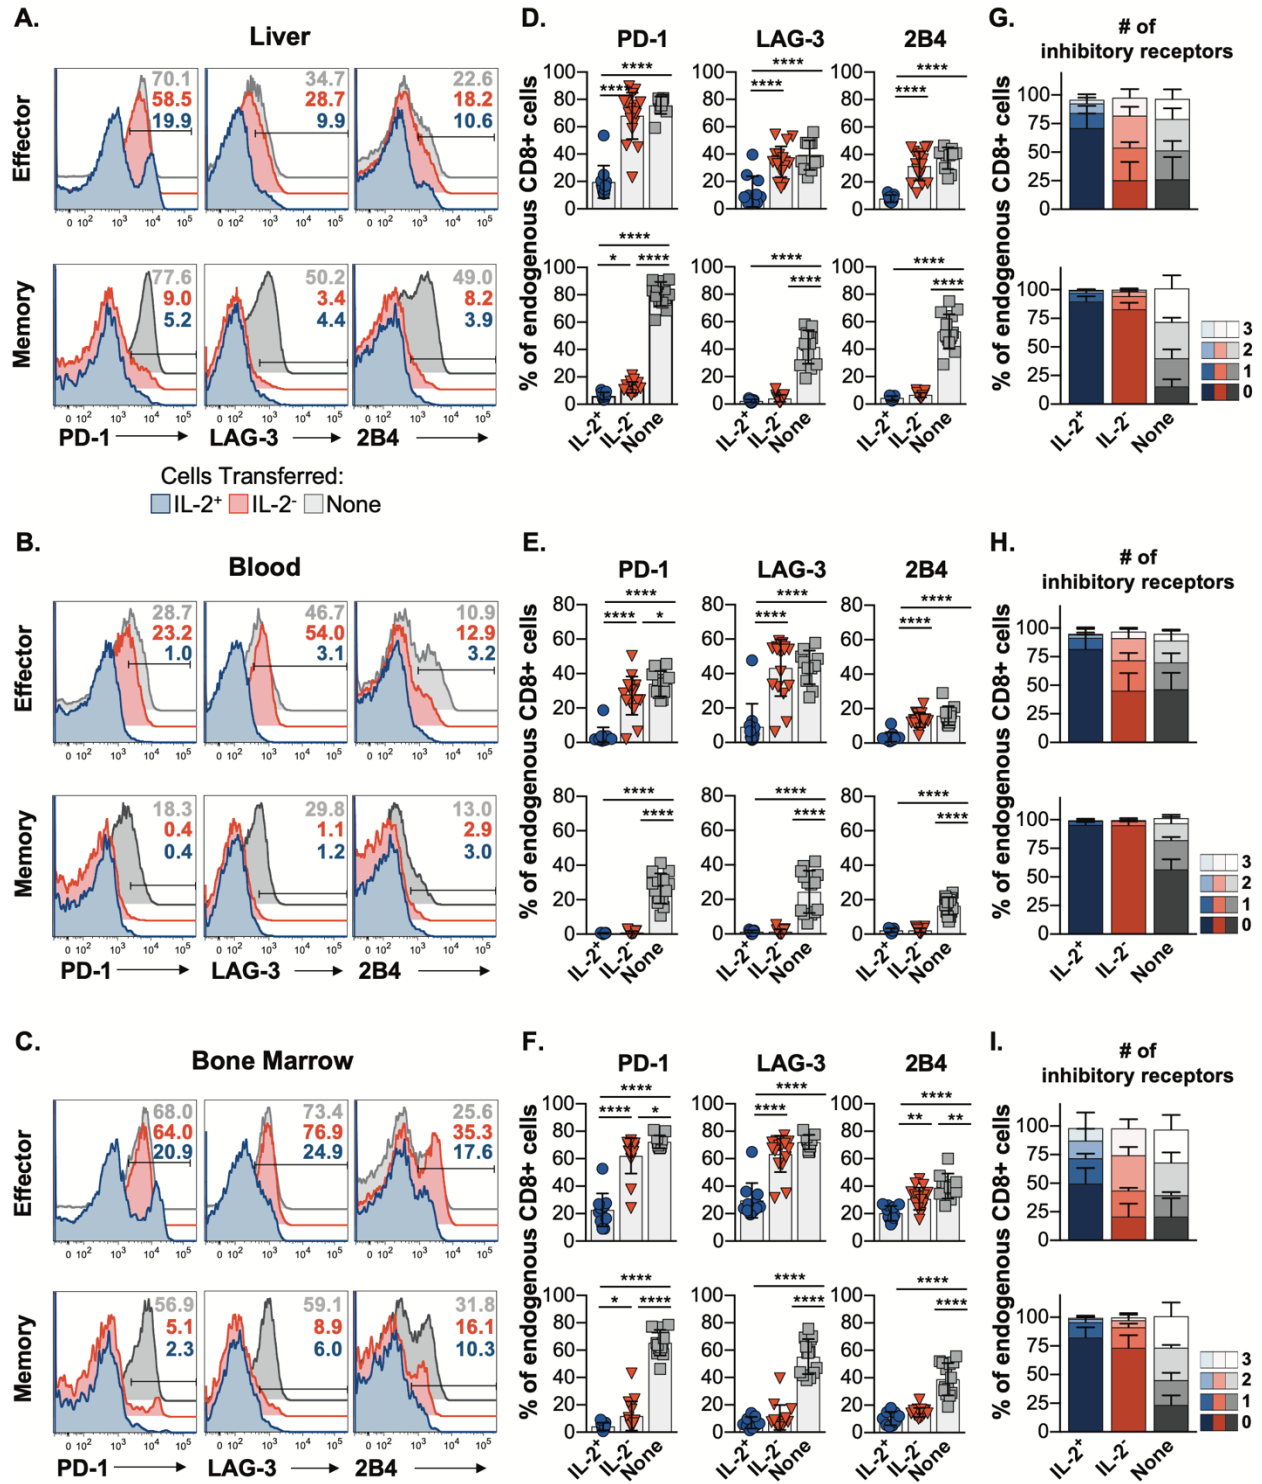

**Figure S4. Endogenous CD8 T cells become exhausted in the presence of non-IL-2-producing effector cells.**

(A-C) The expression of PD-1, LAG-3, and 2B4 by the recipients' endogenous CD8 T cells recovered from the liver (A), blood (B), and bone marrow (C) of mice that received donor NP396-specific IFN- $\gamma$ <sup>+</sup>IL-2<sup>+</sup> (blue) or IFN- $\gamma$ <sup>+</sup>IL-2<sup>-</sup> (red) effector (top) or memory (bottom) cells. Responses in control mice that did not receive donor cells (none; gray) are also shown. Cell transfers, LCMV-clone 13 challenge, and analyses were conducted as depicted in Figure 3A.

(D-F) Composite data of PD-1, LAG-3, and 2B4 expression by endogenous CD8 T cells recovered from the liver (D), blood (E), and bone marrow (F) of the indicated cohorts of recipients at 14 days post-challenge.

(G-I) Bar graphs depict the proportion of endogenous CD8 T cells recovered from the liver (G), blood (H), and bone marrow (I) of the indicated cohorts of recipients that co-express 0, 1, 2, or 3 of the analyzed inhibitory receptors.

Representative or composite findings are shown from 3 experiments analyzing a total of 9-16 mice per group. Bar graphs show mean  $\pm$  SD with p values calculated using one-way ANOVA.

\*p<0.05, \*\*p<0.01, \*\*\*p<0.001, \*\*\*\*p<0.0001

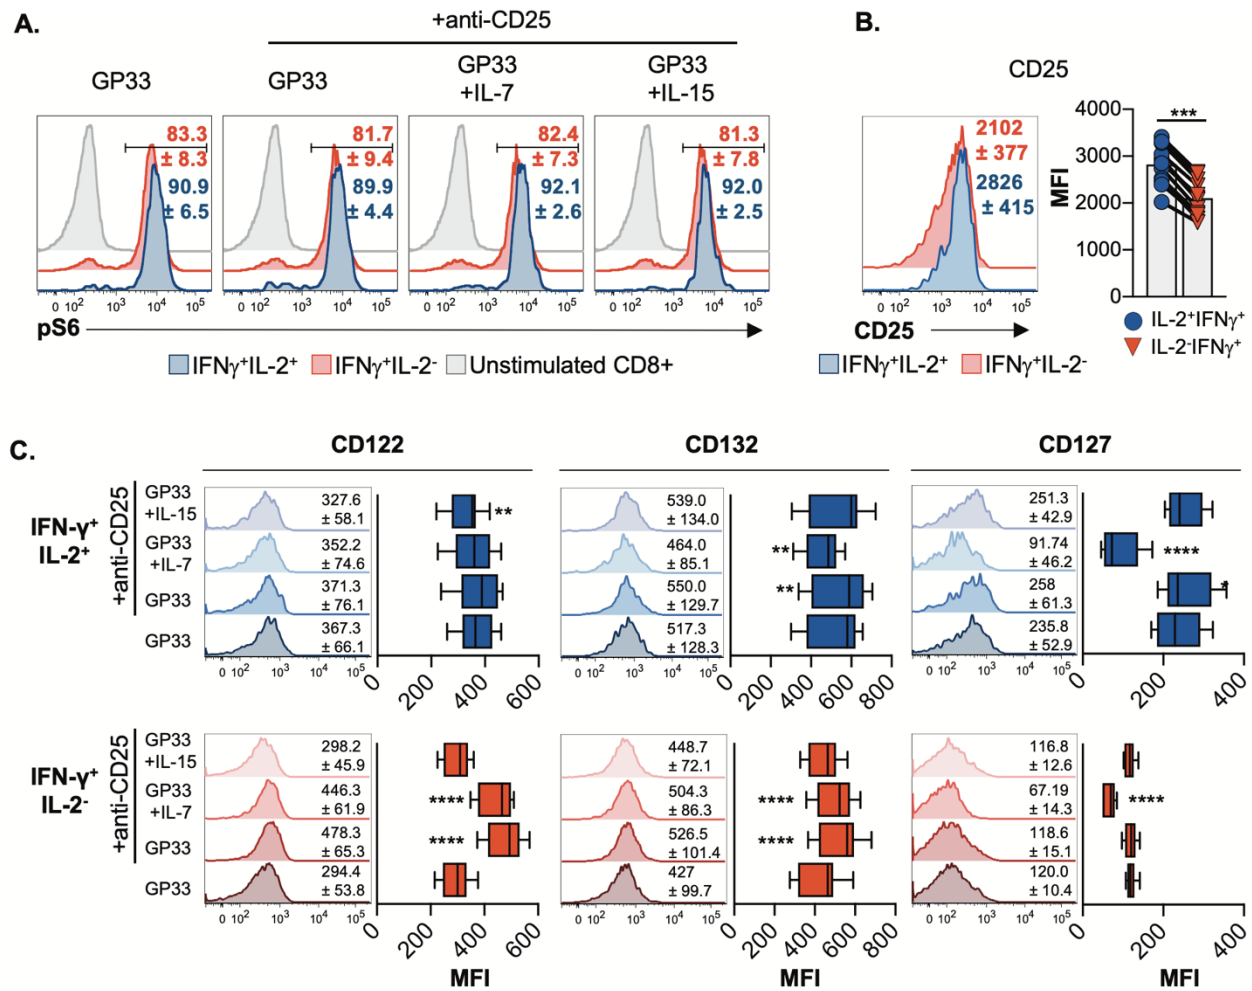

**Figure S5. IL-2-producing and non-producing effector CD8 T cells are differentially sensitive to IL-2, IL-7, and IL-15.**

(A) Splenocytes from LCMV-infected mice were prepared at eight days following LCMV infection and stimulated with a mix of GP33, NP396, and GP276 peptide epitopes in the presence or absence of anti-CD25 blocking antibodies for 5 hours. Certain samples were stimulated with recombinant IL-7 or IL-15 for the final 30 minutes of the culture period. Representative flow cytometry histograms show phosphorylated S6 (pS6) levels by IL-2-producing (IFN- $\gamma$ <sup>+</sup>IL-2<sup>+</sup>; blue) and non-producing (IFN- $\gamma$ <sup>+</sup>IL-2<sup>-</sup>; red) CD8 T cells. pS6 levels in unstimulated control cells are shown in gray. Numerical values given on the plots are percentages  $\pm$  SD. (B) Representative flow histograms (left) and composite results (right) show



CD25 expression by IL-2-producing and non-producing P14 LCMV-specific CD8 T cells at 8 days post infection, following stimulation with the GP33 peptide. (C) The CD122, CD132, and CD127 levels on IL-2 producing and non-producing P14 CD8 T cells procured and stimulated as described above. In (B) and (C) numerical values given on the plots are MFI  $\pm$  SD. p values were calculated using paired two-tailed t-test (B) and one-way ANOVA (C). Representative or composite results are presented from 3 independent experiments analyzing a total of 8-12 mice in each group. \*p<0.05, \*\*p<0.01, \*\*\*p<0.001, \*\*\*\*p<0.0001

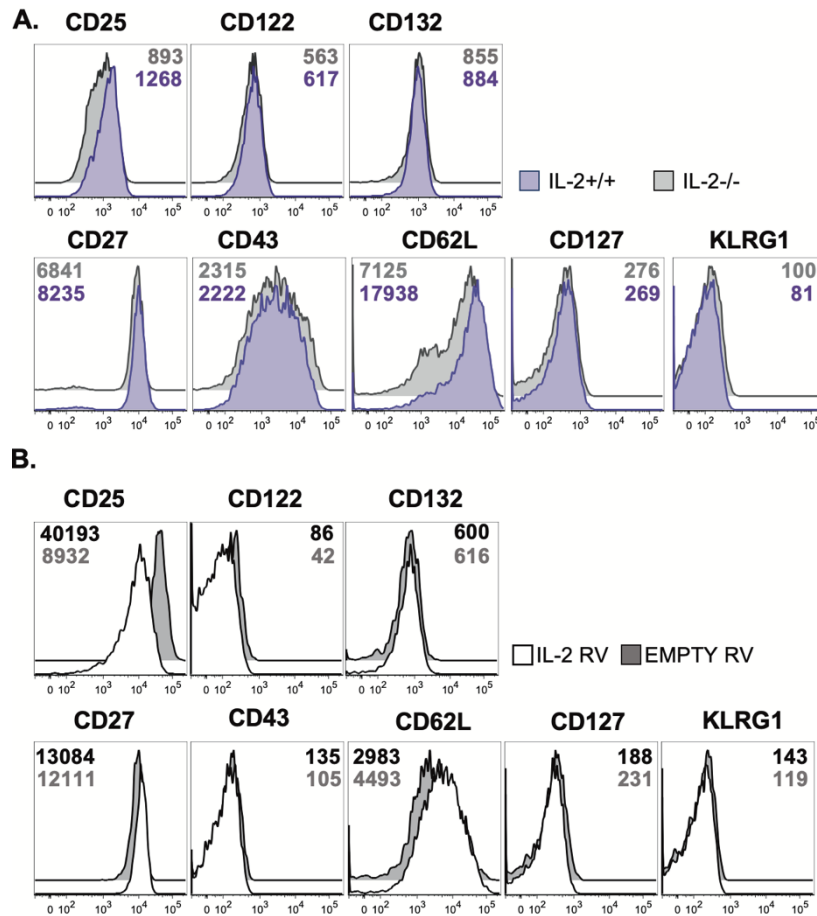

**Figure S6. Phenotypic similarities of in vitro differentiated CD8 T cells.**

(A) Purified naïve IL-2<sup>+/+</sup> and IL-2<sup>-/-</sup> P14 CD8 T cells were stimulated with GP33 peptide pulsed irradiated feeder cells and cultured using a staggered IL-2 and IL-15 regime for a total of 5 days prior to assessing phenotypes.

(B) Purified naïve splenic P14 CD8 T cells were activated with anti-CD3 and anti-CD28 antibodies and retrovirally transduced with either empty/ control or IL-2-expressing MSCV. The phenotypes of the transduced GFP-expressing cells were then assessed.

In each case representative data from one of 3 experiments are shown.

Figure S7

**GATING STRATEGIES**

*Figure 1A-E, S2 A-B*

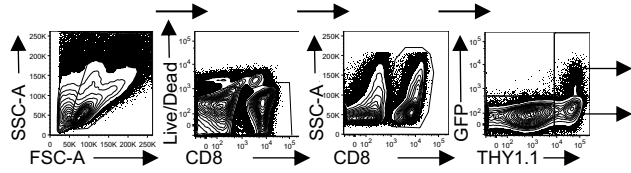

*Figure 1F-G*

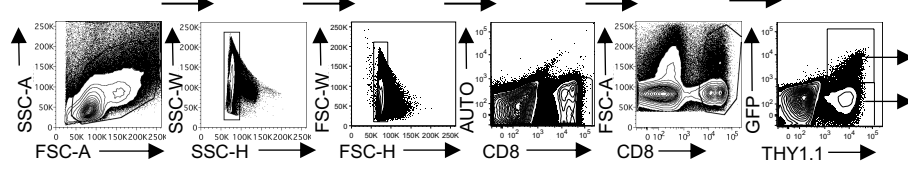

*Figure 1H-I*

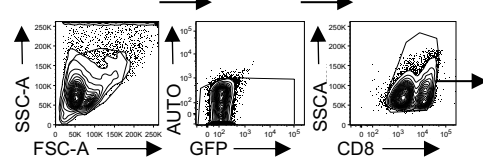

*Figure 2A, 3A Sort*

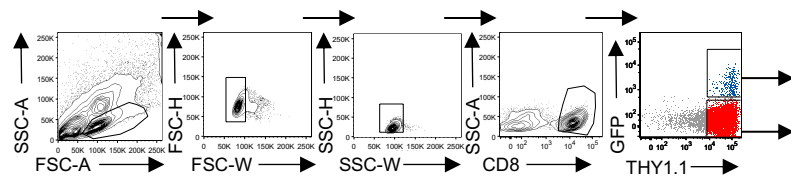

*Figure 2B-E, S2C*

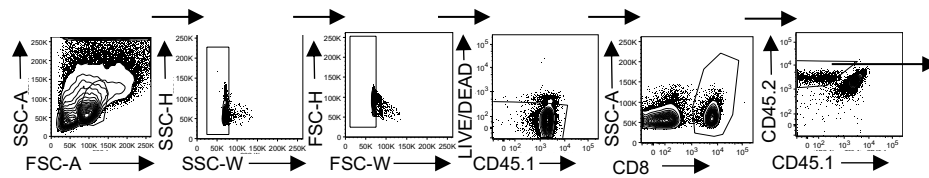

*Figure 3B-C, 4A-H, S3, S4*

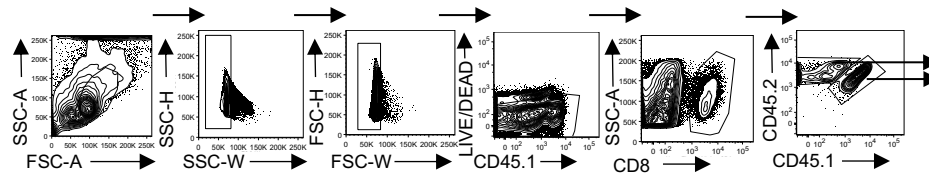

*Figure 5 sort, S1C*

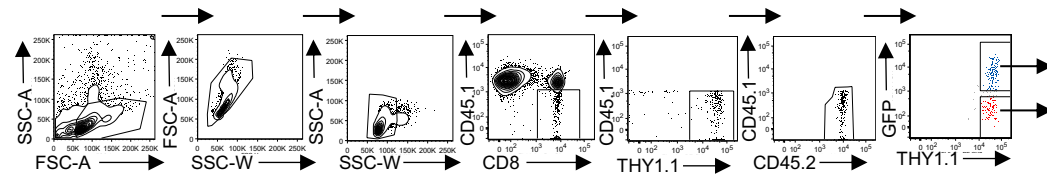

Figure S7 continued

Figure 6A

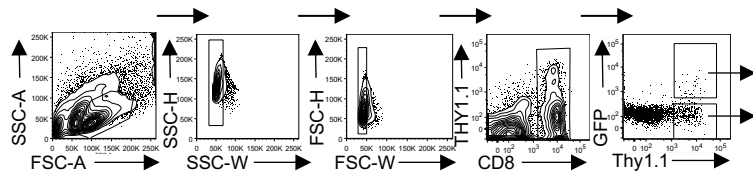

Figure 6B-C, S5A

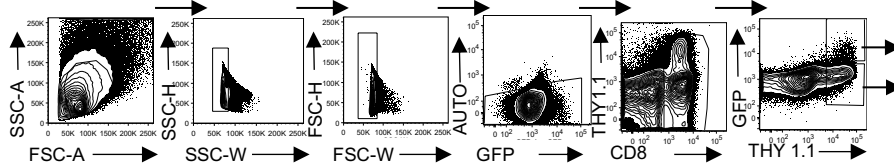

Figure 6D-E, S6

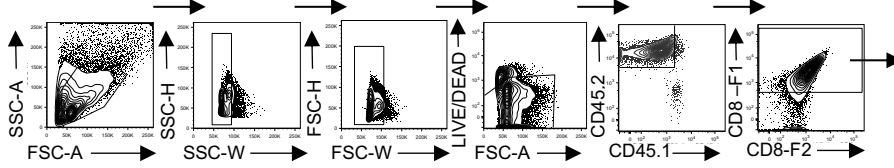

Figure 6F

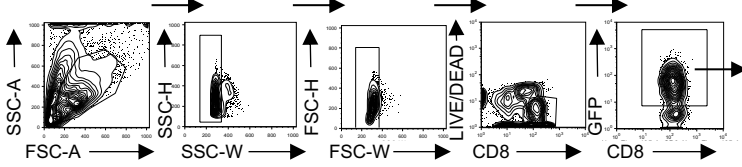

Figure 6G

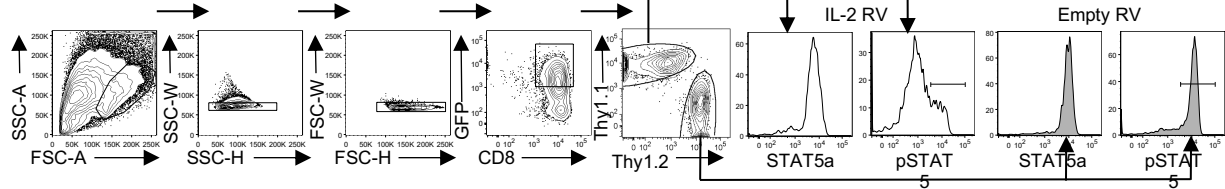

Figure S1B

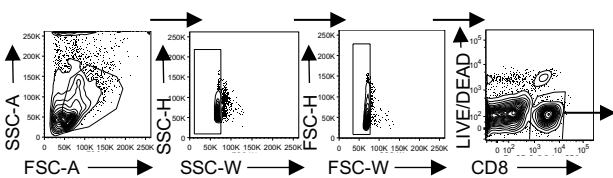

Figure S2C, S5B-C

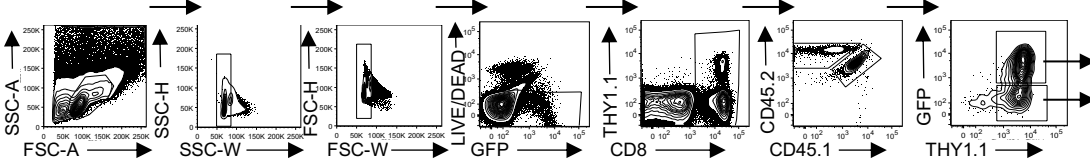

**Figure S7. Flow cytometric gating strategies.**

Each series of panels depict the flow cytometric gating strategies that were used in the indicated figures.
